# Supplementary material for: A regular rippled pattern formed by the molecular self-organization of polyvinylpyrrolidone encapsulated Ag nanoparticles: a high transmissive coating for efficiency enhancement of c-Si solar cells
Source: Royal Society of Chemistry journal article supplement (doi:10.1039/c4ra11684d), 2014-12-08

Electronic Supplementary Information  
ESI – I

Regular rippled pattern formed by molecular self-organization of  
polyvinylpyrrolidone encapsulated Ag nanoparticles: A high transmissive coating  
for efficiency enhancement of c-Si solar cells

Sudarshana Banerjee<sup>a</sup>, Ajoy K. Saha<sup>b,c</sup>, Bibhutibhushan Show<sup>d</sup>, Jhuma Ganguly<sup>b</sup>, Raghunath  
Bhattacharyay<sup>a</sup>, Swapan K Datta<sup>a</sup>, Hiranmay Saha<sup>a</sup>, Nillohit Mukherjee<sup>a\*</sup>

<sup>a</sup>Centre of Excellence for Green Energy and Sensor Systems, Indian Institute of Engineering  
Science and Technology, Shibpur, Howrah 711103, West Bengal, India

<sup>b</sup>Department of Chemistry, Indian Institute of Engineering Science and Technology, Shibpur,  
Howrah 711103, West Bengal, India

<sup>c</sup>Department of Materials Science and Engineering, University of Florida, Florida, Gainesville,  
United States of America

<sup>d</sup>Department of Chemistry, Jadavpur University, Kolkata 700032, India

\*Corresponding author email: [nilsci@yahoo.co.uk](mailto:nilsci@yahoo.co.uk)

UV-Vis absorption spectrum of the blank Ag precursor, i.e. 5.3 milimolar AgNO<sub>3</sub> solution, obtained by dissolving 0.09 g of AgNO<sub>3</sub> in 100 ml of redistilled water; is showing a characteristics absorption peak at around 304 nm.

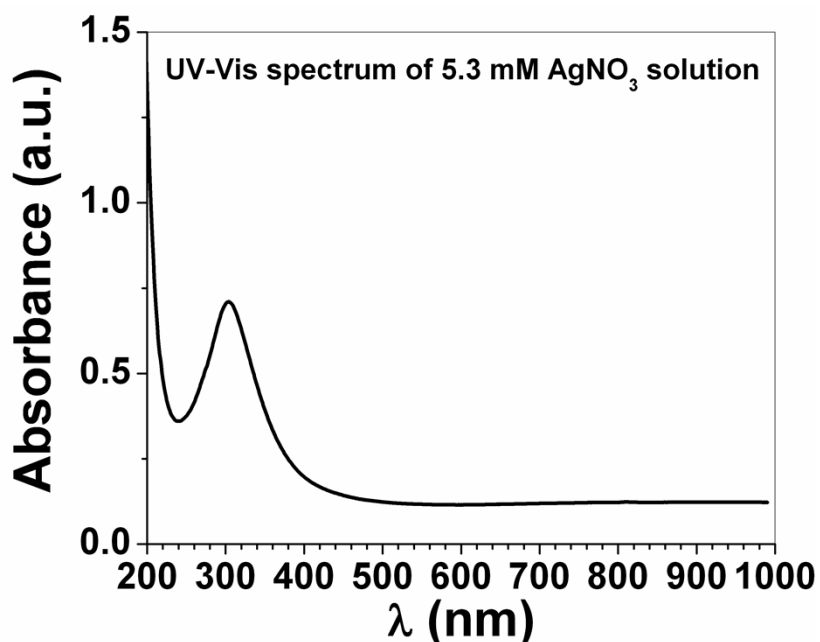

Supplement: c4ra11684d1.pdf [file c4ra11684d1.pdf]
